# Supplementary material
Source: publisher figshare collection journal article supplement (https://acs.figshare.com/ndownloader/files/4720225)
Supplement: Supplementary file 1 [file 4720225]

## **Supporting information for**

### **Self-Assembled ZnS Nanostructured Spheres: Controllable Crystal Phase and Morphology**

Hua Tong, Ying-Jie Zhu\*, Li-Xia Yang, Liang Li, Ling Zhang,  
Jiang Chang, Li-Qiong An, and Shi-Wei Wang

*State Key Laboratory of High Performance Ceramics and Superfine Microstructure,  
Shanghai Institute of Ceramics, Chinese Academy of Sciences, Shanghai 200050, P.  
R. China, Graduate School of Chinese Academy of Sciences, P. R. China*

---

\* Corresponding author. E-mail: [y.j.zhu@mail.sic.ac.cn](mailto:y.j.zhu@mail.sic.ac.cn) (Y. J. Zhu)

Tel: +86-21-52412616 Fax: +86-21-52413122

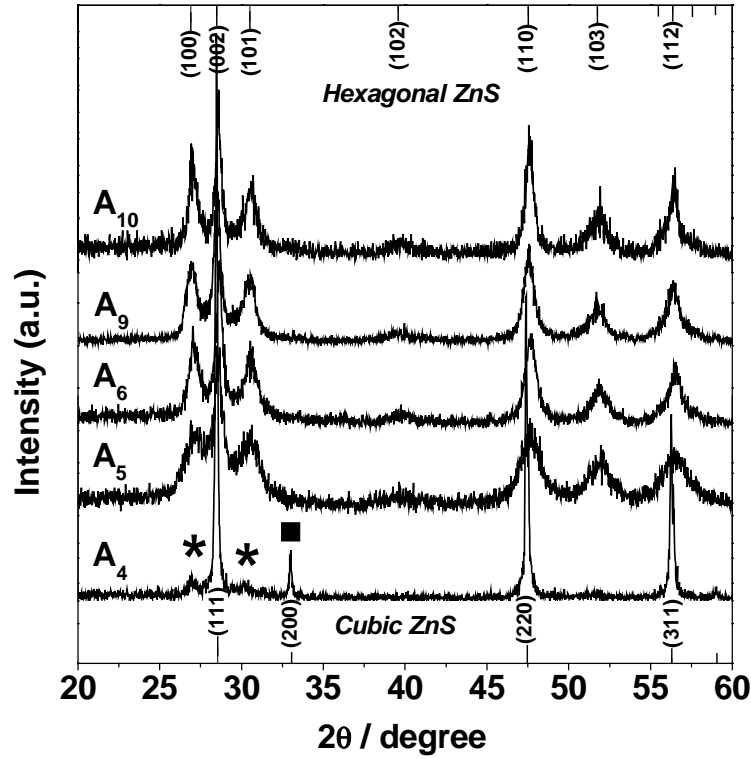

**Figure S1** XRD patterns of ZnS samples ( $A_4$ - $A_6$ ,  $A_9$  and  $A_{10}$ ). (■) (200) diffraction peak of the cubic ZnS; (\*) (100) and (101) diffraction peaks of the hexagonal ZnS.

### The eduction of the formula

Gibbs-Thompson equation (eq.1) indicates that the solubility of a small crystal is dependent on its size and surface energy.

$$S_r = S_b \exp(2\sigma V_m / rRT) \quad (1)$$

Where  $r$  is the radius of the crystal,  $\sigma$  is the surface energy,  $V_m$  is the molar volume of the material,  $R$  is the gas constant,  $T$  is the absolute temperature,  $S_b$  and  $S_r$  are the

solubility of bulk crystal and crystal with a radius  $r$ , respectively. Herein, the crystal is viewed as a sphere with a small radius  $r$  and a homogeneous surface. Replacing  $r$  with the crystal surface area  $A = 4\pi r^2$  in eq. 1, then

$$S_A = S_b \exp(4\pi^{1/2} V_m \sigma / RTA^{1/2}) \quad (2)$$

Where,  $S_A$  and  $S_b$  are the solubility of a crystal with a small surface area  $A$  and bulk crystal, respectively. Equation 2 indicates that the solubility of a small crystal is also dependent on its surface area and surface energy.

Dissolution is a process occurring on the surface of a crystal and is related to surface features of a crystal. Therefore, it is reasonable to consider the solubility of a crystal as the solubility of the surface. For a small anisotropic crystal with the surface made up of a series of planes, the solubility of the crystal is the summation of those from a series of planes. The solubility of a specific plane in a small crystal can be described by Equation 3 deduced from Equation 2.

$$S_A = S_b \exp(4\pi^{1/2} V_m \sigma_A / RTA^{1/2}) \quad (3)$$

Where,  $\sigma_A$  is the surface energy of a specific plane,  $S_A$  and  $S_b$  are the solubility of a specific plane with a small surface area  $A$  and the same plane on bulk crystal, respectively. Suppose  $C = S_b \exp(4\pi^{1/2} V_m / RT)$ ,  $C$  may be regarded as a constant at a specific temperature due to neglectable difference in  $S_b$  for different planes on a bulk crystal. Replacing  $C$  into eq.2, then

$$S_A = C \exp(\sigma_A / A^{1/2}) \quad (4)$$
